# Supplementary material
Source: publisher figshare collection journal article supplement (https://sage.figshare.com/ndownloader/files/22213812)
Supplement: Supplementary file 1 [file 22213812]

**Subject:** Re: Journal of Contemporary History - Decision on Manuscript ID JCH-Mar-2019-1499.R1  
**Date:** Wednesday, 30 October 2019 at 17:26:45 Greenwich Mean Time  
**From:** Constantin Katsakioris  
**To:** J Toynbee  
**CC:** Konstantinos.Katsakioris@uni-bayreuth.de

Dear Jeremy,

Ms. Chloe Mackney just answered me that indeed Bayreuth University has a deal with SAGE for Open Access. As I wrote and submitted the paper when I was in Bayreuth, I find it fair and interesting both for me and for Bayreuth University to use my Bayreuth affiliation. This, of course, if you have no objection.

Below is Ms. Mackney's message.

Best wishes

Constantin

Dear Constantin Katsakioris, Thank you for your email. Bayreuth University does have a deal with SAGE whereby you can make your article open access for a discounted rate of 200 GBP. Once your paper enters production, it will be checked for eligibility for the DFG deal. I have taken a preliminary look and, as you have declared your affiliation with Bayreuth University, your article should qualify. Once your papers has been identified as qualifying, you will receive the SAGE Choice open access contributor form to sign from the Open Access Team. Please sign and return this form as this will enable SAGE to publish your article open access. Please let me know if you have any queries about this process.

Kind regards, Chloe Mackney Senior Publishing Assistant (Open Access) SAGE Publishing, EC1Y 1SP [www.sagepublishing.com](http://www.sagepublishing.com)

On Friday, October 4, 2019, 7:19:33 PM GMT+3, J Toynbee <[office@jch.org.uk](mailto:office@jch.org.uk)> wrote:

Most helpful thanks.

Jeremy
